# Supplementary material for: Cyano-decorated ligands: a powerful alternative to fluorination for tuning the photochemical properties of cyclometalated Ir(iii) complexes
Source: Royal Society of Chemistry journal article supplement (doi:10.1039/c6dt01516f), 2016-01-01
Supplement: c6dt01516f1.pdf [file c6dt01516f1.pdf]

## Supporting Information

### Cyano-decorated Ligands: A Powerful Alternative to Fluorination for Tuning the Photochemical Properties of Cyclometalated Ir(III) Complexes

Isaac N. Mills, Husain N. Kagalwala, Stefan Bernhard\*

Department of Chemistry, Carnegie Mellon University, 4400 Fifth Avenue, Pittsburgh, PA 15213, United States

| <b>Table of Contents</b>                                           | <b>Page</b> |
|--------------------------------------------------------------------|-------------|
| <sup>1</sup> H-NMR, <sup>13</sup> C-NMR Data for Ligand <b>1</b>   | S2          |
| <sup>1</sup> H-NMR, <sup>13</sup> C-NMR Data for Complex <b>3a</b> | S3          |
| Cyclic Voltammogram of Complex <b>3a</b>                           | S4          |
| <sup>1</sup> H-NMR, <sup>13</sup> C-NMR Data for Complex <b>3b</b> | S4-S5       |
| Cyclic Voltammogram of Complex <b>3b</b>                           | S5          |

Supporting data for ligand **1**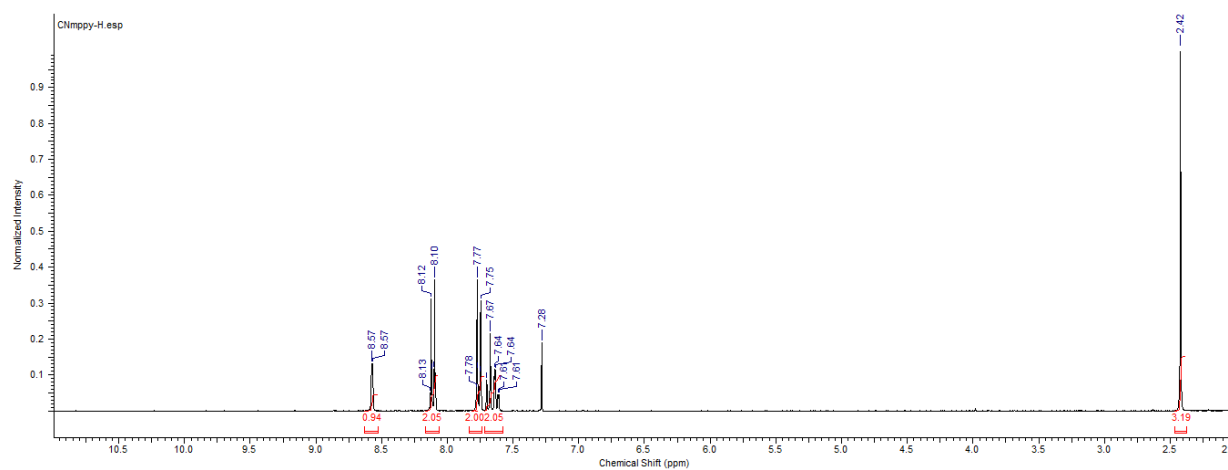Figure S1:  $^1\text{H-NMR}$  spectrum of **1** in  $\text{CD}_3\text{Cl}$  at 300 MHz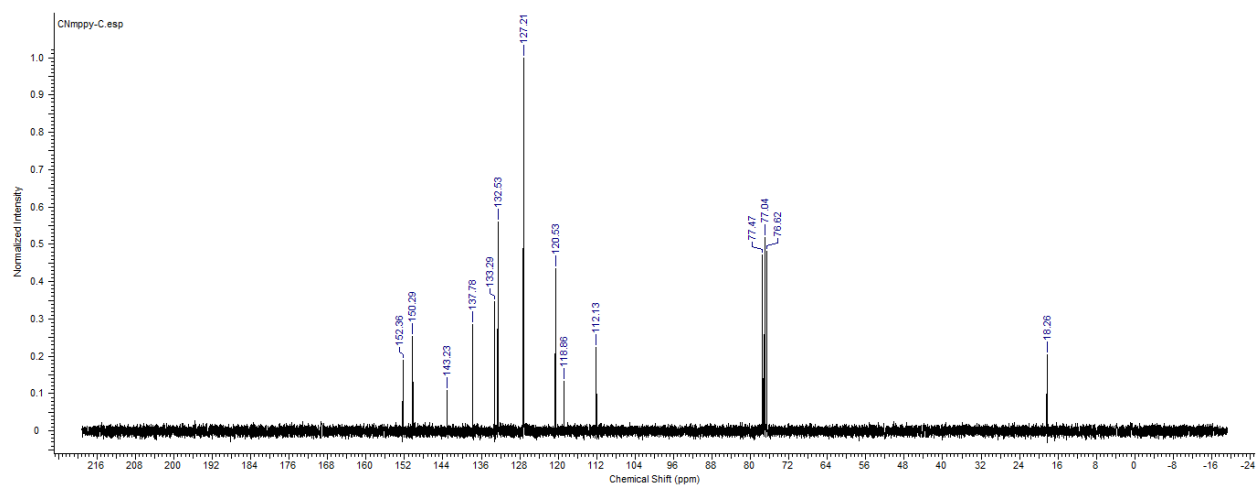Figure S2:  $^{13}\text{C-NMR}$  spectrum of **1** in  $\text{CD}_3\text{Cl}$  at 75 MHz

Supporting data for [Ir(CNmpyy)<sub>2</sub>(dtbbpy)]PF<sub>6</sub>, **3a**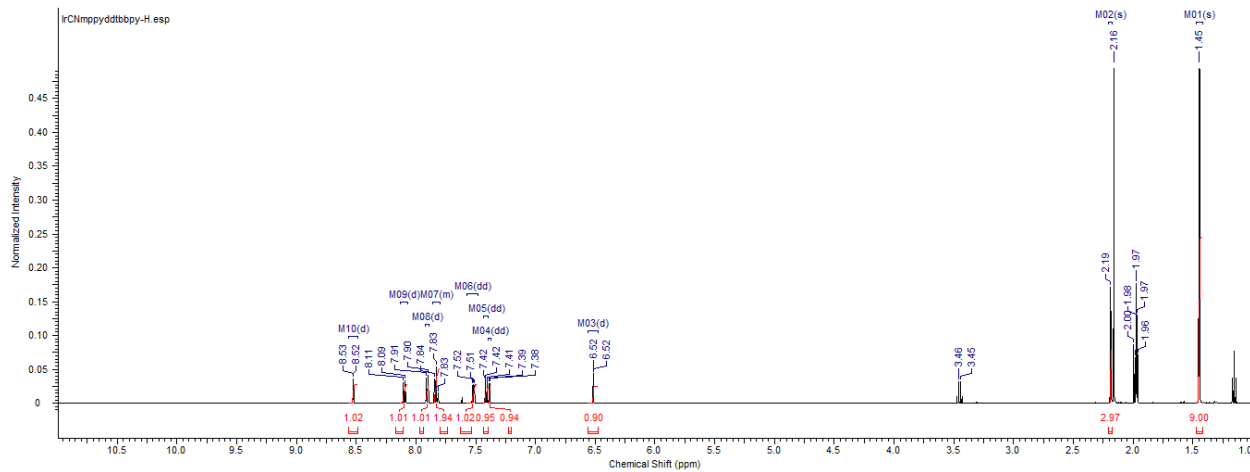Figure S3: <sup>1</sup>H-NMR spectrum of **3a** in CD<sub>3</sub>CN at 500 MHz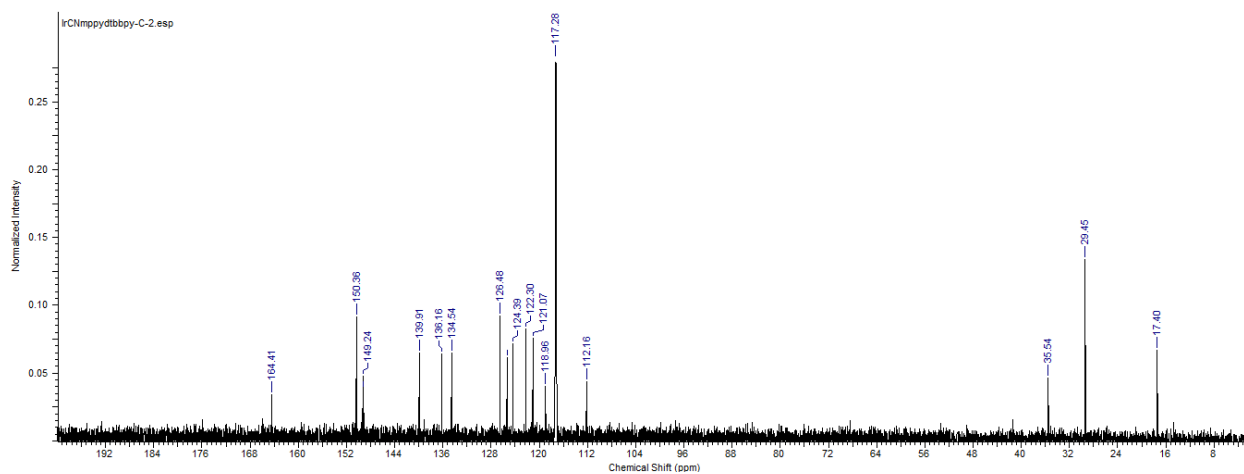Figure S4: <sup>13</sup>C-NMR spectrum of **3a** in CD<sub>3</sub>CN at 125 MHz

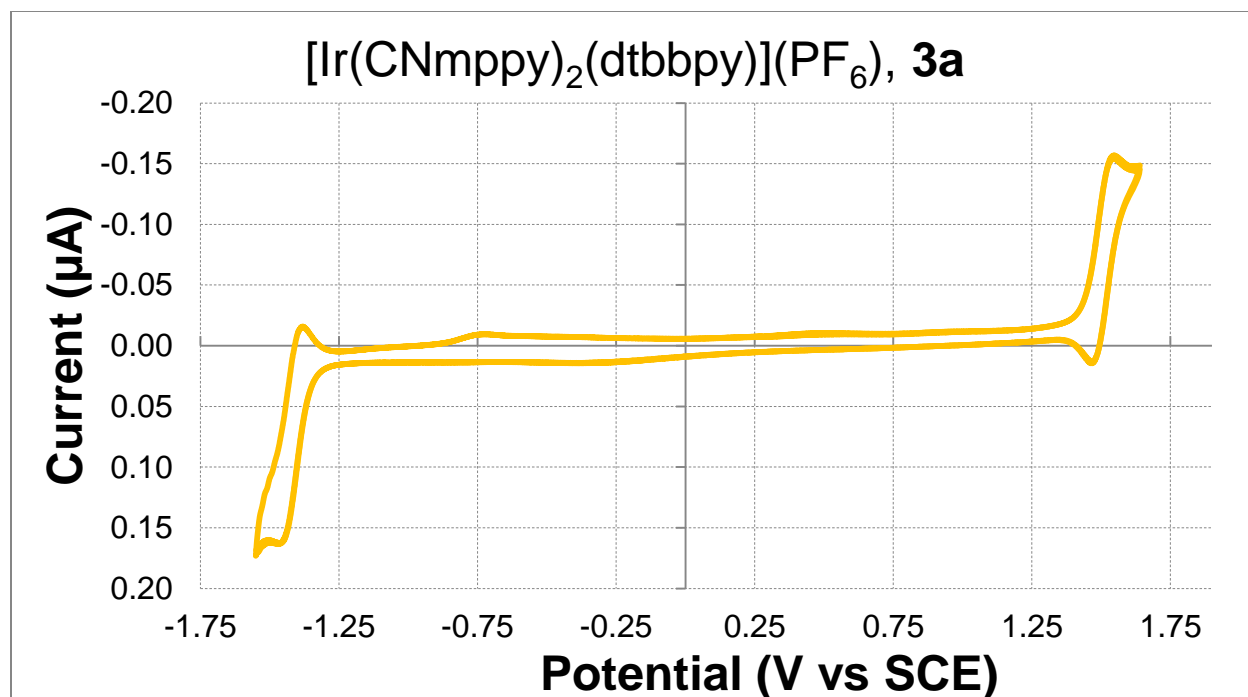

Figure S5: Cyclic voltammogram of **3a** in acetonitrile with 1 mM analyte and 0.1 M (tBu)<sub>4</sub>NPF<sub>6</sub> as supporting electrolyte

Supporting data for [Ir(CNmppy)<sub>2</sub>(dCNbpy)]PF<sub>6</sub>, **3b**

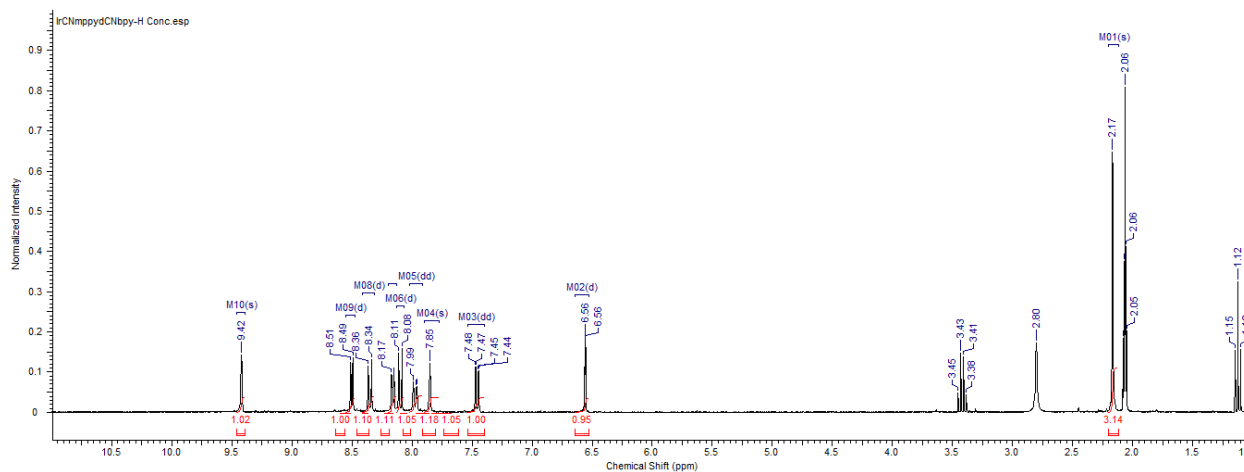

Figure S6: <sup>1</sup>H-NMR spectrum of **3b** in CD<sub>3</sub>CN at 500 MHz

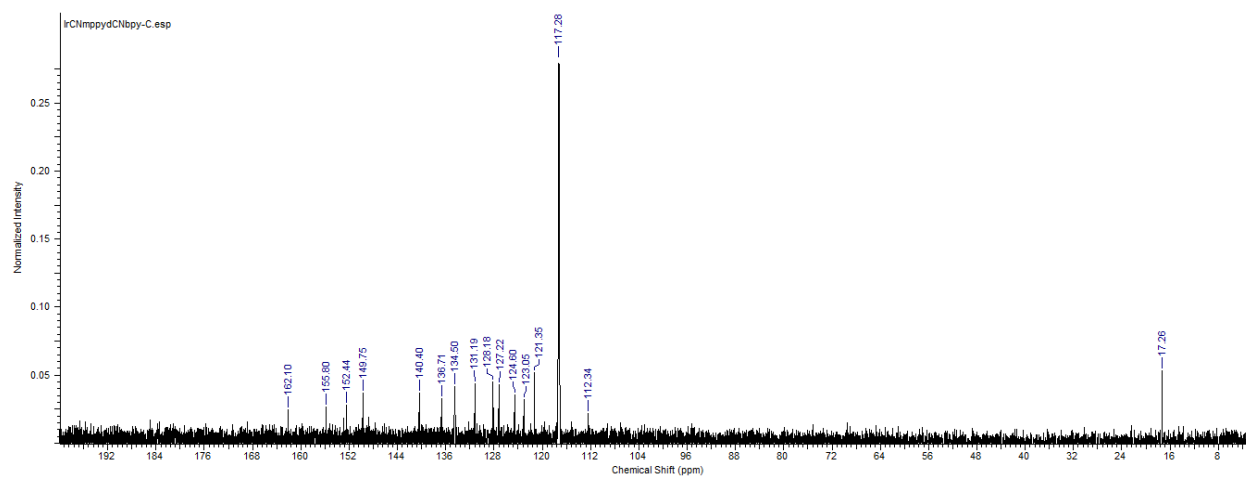

Figure S7: <sup>13</sup>C-NMR spectrum of **3b** in CD<sub>3</sub>CN at 125 MHz

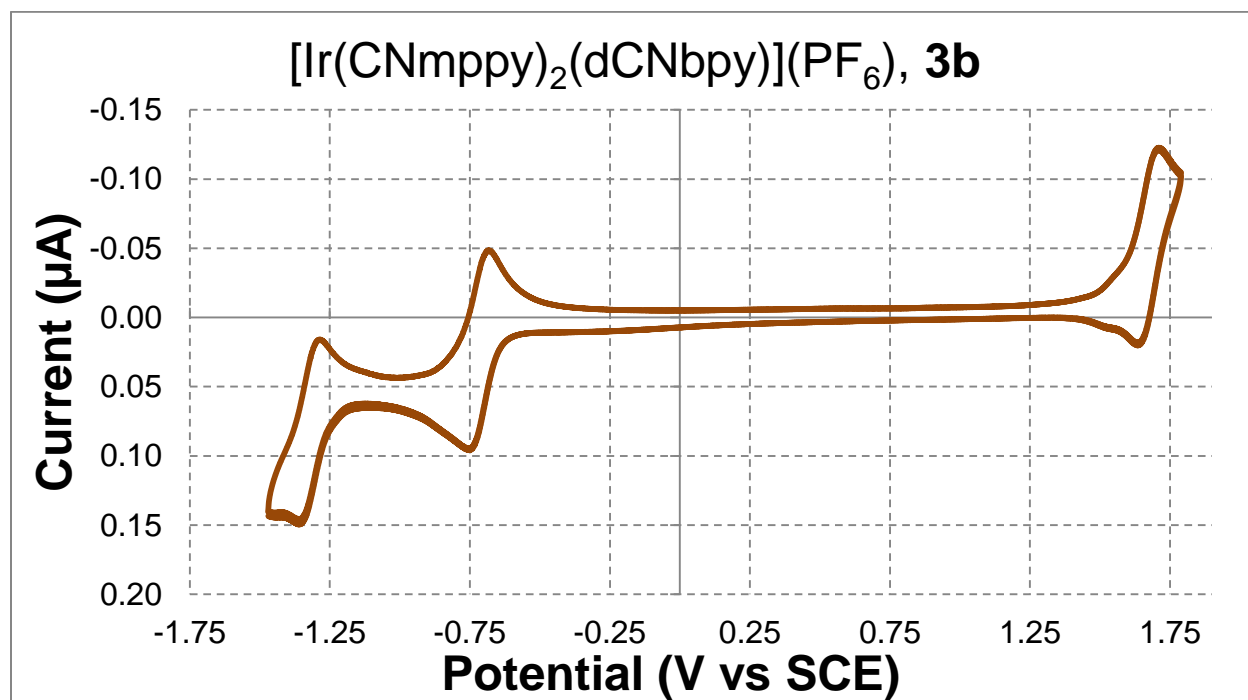

Figure S8: Cyclic voltammogram of **3b** in acetonitrile with 1 mM analyte and 0.1 M (tBu)<sub>4</sub>NPF<sub>6</sub> as supporting electrolyte
